# Supplementary material
Source: HighWire-hosted journal article supplement (https://ijgc.bmj.com/content/30/2/160)
Supplement: inline-supplementary-material-2 [file inline-supplementary-material-2.pdf]

INTERNATIONAL JOURNAL OF  
**GYNECOLOGICAL CANCER**

**Evaluation of Disease Recurrence in Robotic Surgery Compared with Laparotomy in Intermediate-Risk Endometrial Cancer**

**Co-authors:** Jiheon Song; Tien Le; Laura Hopkins; Michael Fung-Kee-Fung; Krystine Lupe; Marc Gaudet; Choan E; Rajiv Samant

Robotic surgery was associated with higher recurrence rate than laparotomy in stage I intermediate-risk endometrial cancer

No difference in 5-year overall survival was seen between robotic surgery and laparotomy

Adjuvant radiotherapy, especially vaginal brachytherapy, resulted in loco-regional disease control comparable to historical control

Read the full article by searching the DOI: **10.1136/ijgc-2019-000838**
